# Supplementary material for: Hyperactivation of MAPK Induces Tamoxifen Resistance in SPRED2-Deficient ERα-Positive Breast Cancer
Source: MDPI journal article supplement (doi:10.3390/cancers14040954), 2022-02-14
Supplement: s1 [file s1]

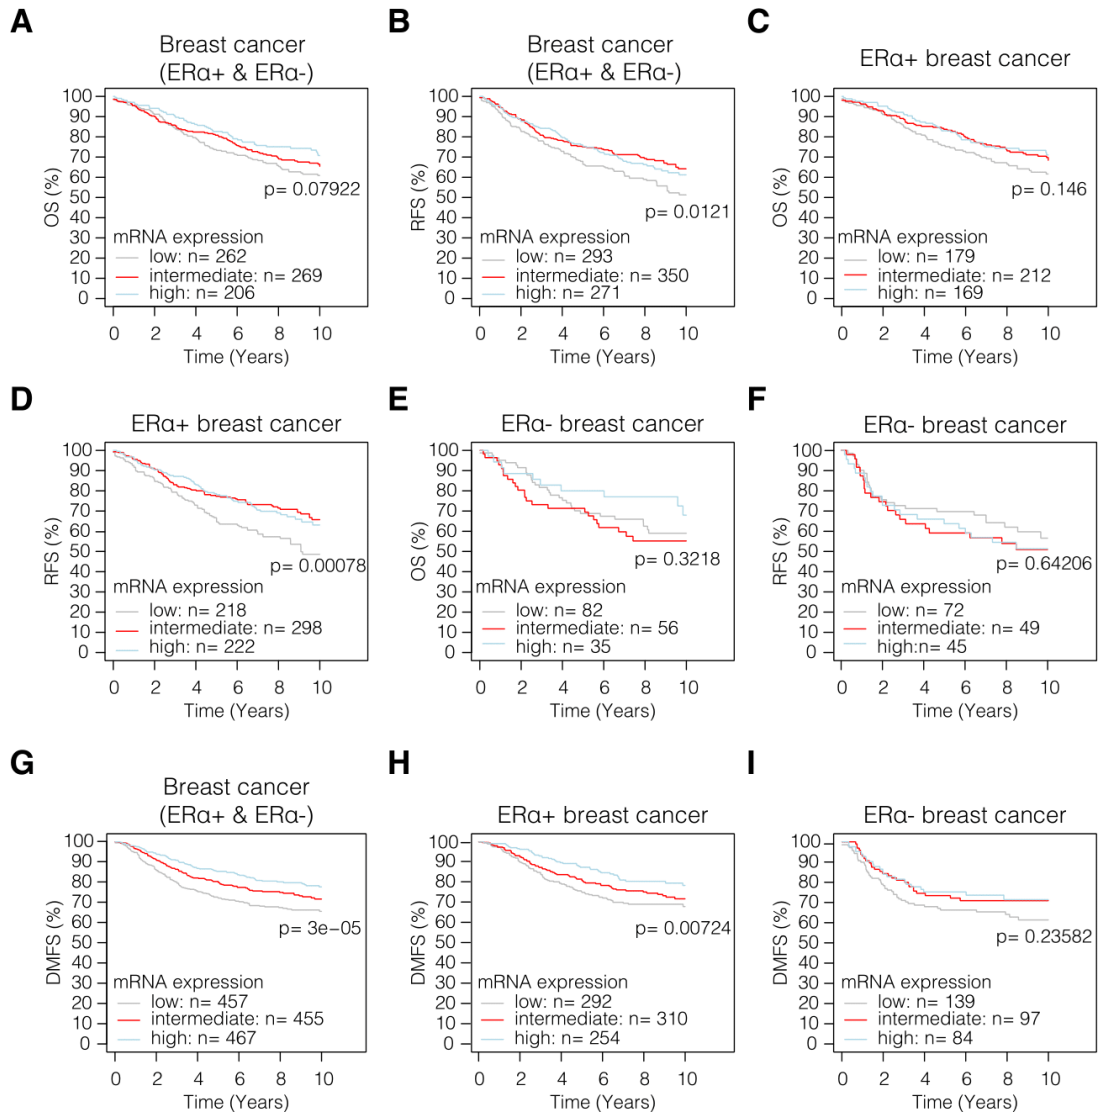

**Figure S1.** Low *SPRED2* gene expression correlates with poor survival of patients with breast tumors. (A-F) Kaplan-Meier plots derived from the GOBO database for OS and RFS of all (A,B), ERα+ (C,D) and ERα- (E,F) breast cancer patients classified as having tumors expressing high levels (blue line), intermediate levels (red line) and low levels (grey line) of *SPRED2* mRNA. (G-E) Kaplan-Meier plots derived from the GOBO database for distant metastasis free survival (DMFS) of all (G) ERα+ (H) and ERα- (I) breast cancer patients classified as above.

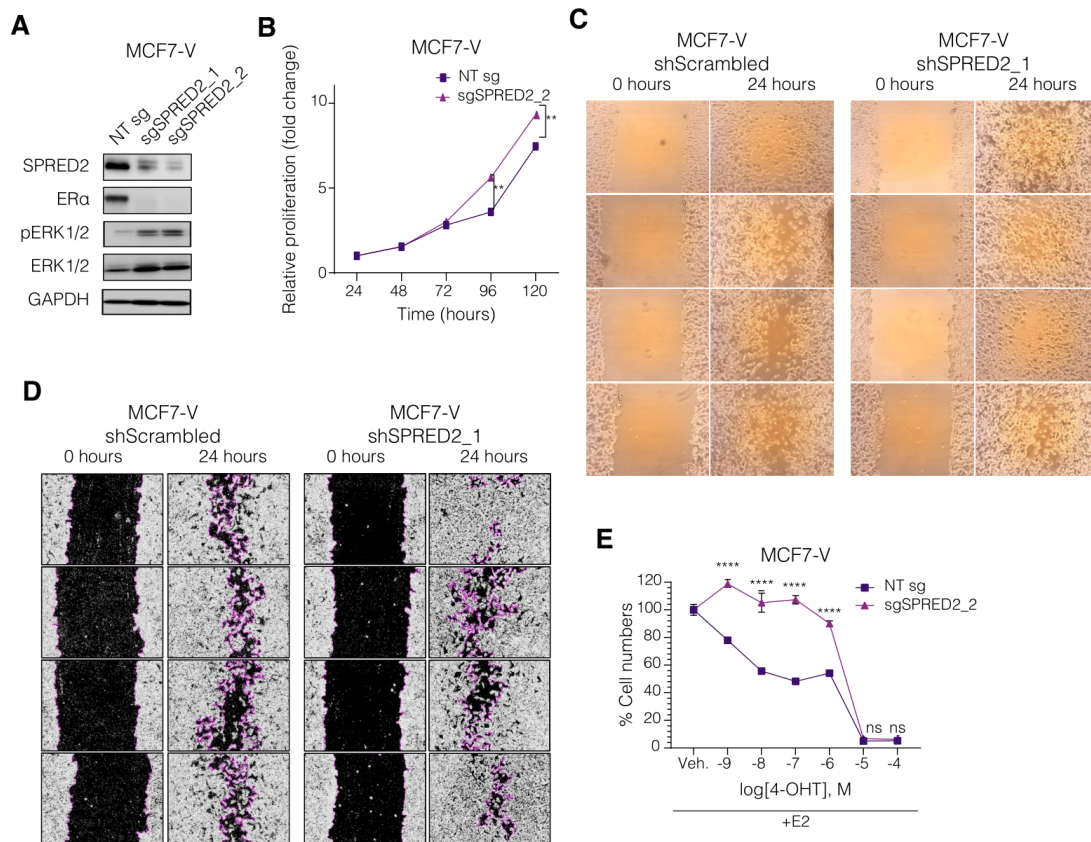

**Figure S2.** *SPRED2* deficiency enhances cell proliferation, migration, and induces resistance to 4-OHT in ERα+ BC cells. **(A)** Representative immunoblots with specific antibodies showing the efficiency of reducing *SPRED2* levels in MCF7-V cells with the CRISPR/Cas9 system, as well as the protein levels of ERα and MAPK-related proteins. Note that *SPRED2* protein is not completely eliminated indicating only partial sg*SPRED2*-mediated knockouts. Uncropped images of immunoblots with molecular weight standards are in Figure S5. **(B)** Relative proliferation of MCF7-V clones expressing either a non-targeting control (NT sg) or *SPRED2*-targeted (sg*SPRED2*) sgRNA, measured by crystal violet assay in monolayer cultures. The number of cells for each of the them are standardized to the corresponding values at 24 h set to 1. **(C,D)** Raw **(C)** and ImageJ-edited images **(D)** of the four replicates each of the scratch wound healing assays with MCF7-V cells. **(E)** Dose-response curves of MCF7-V cells, with sgRNA-mediated depletion of *SPRED2*, upon treatment with increasing doses of 4-OHT. Asterisks indicate significant differences compared to the NT sg control (ns for  $p > 0.05$ , \*  $p \leq 0.05$ , \*\*  $p \leq 0.01$ , \*\*\*  $p \leq 0.001$  and \*\*\*\*  $p \leq 0.0001$ ). Statistical significance was determined with a two-way ANOVA.

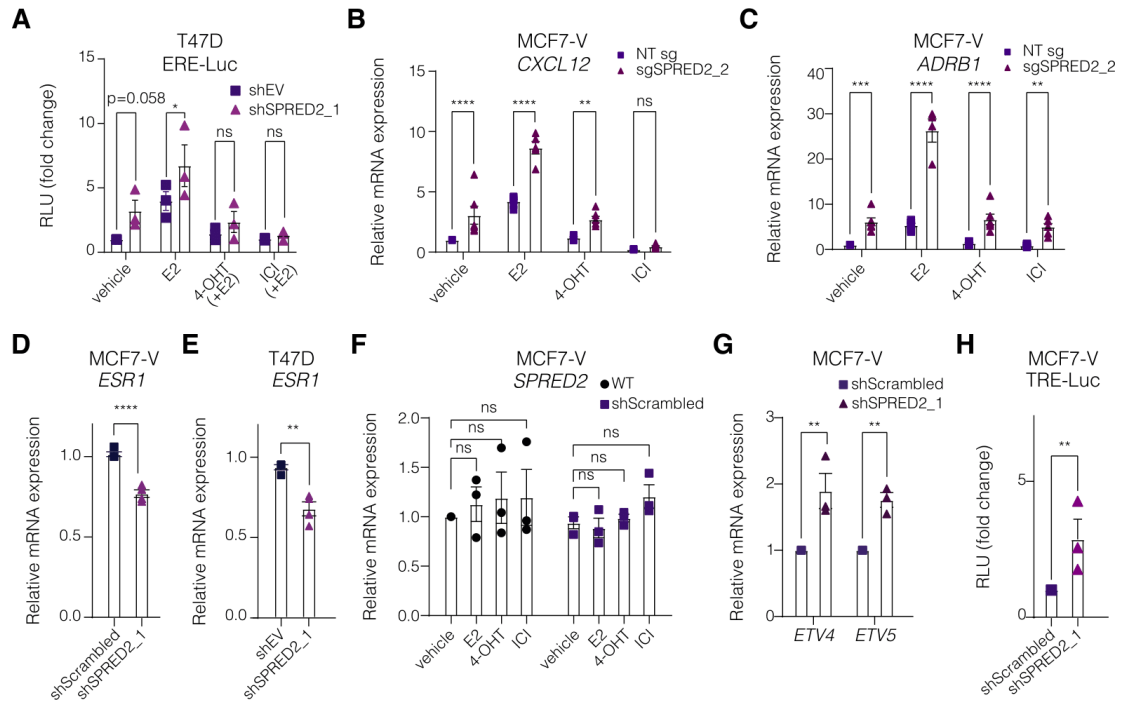

**Figure S3.** Knockdown of *SPRED2* stimulates ER $\alpha$  transcriptional activity by increasing the activity of the MAPKs ERK1/2. **(A)** Luciferase reporter assay with transiently transfected T47D cells. The activity of endogenous ER $\alpha$  was monitored with the ERE-Luc reporter plasmid. RLUs are relative to the activities of the internal transfection standard Renilla luciferase. Graphs are based on n=3 independent experiments. **(B,C)** Expression of ER $\alpha$  target genes in MCF7-V sgRNA clones; mRNA levels were analyzed by RT-qPCR following 6 h of treatments as indicated; n=3 independent experiments. **(D,E)** Expression levels of *ESR1* (ER $\alpha$ ) mRNA determined by RT-qPCR with the indicated MCF7-V **(D)** and T47D **(E)** samples. **(F)** Expression levels of *SPRED2* mRNA in the untransfected parent (WT) MCF7-V cells and in shScrambled MCF7-V cells, measured with RT-qPCR. **(G)** Expression levels of the ERK1/2 target genes *ETV4* and *ETV5* in MCF7-V cells as indicated, measured with RT-qPCR. **(H)** Luciferase reporter assay with transiently transfected MCF7-V cells expressing the indicated shRNAs. The activity of AP-1 was monitored with the TRE-Luc reporter plasmid and expressed as RLU relative to the activities of the internal transfection standard Renilla luciferase. Graphs are based on n=3 independent experiments. All error bars represent the standard errors of the means (mean  $\pm$  SEM). For luciferase assays, asterisks indicate significant differences compared to control cells transduced with empty vector (shEV) (T47D) or viruses for expression of negative control shRNA (shScrambled) (MCF7-V). The data of each bar graph were standardized to the values of the vehicle-treated non-targeted control samples set to 1. For RT-qPCR graphs, asterisks indicate significant differences compared to the NT sg cells (ns for  $p > 0.05$ , \*  $p \leq 0.05$ , \*\*  $p \leq 0.01$ , \*\*\*  $p \leq 0.001$  and \*\*\*\*  $p \leq 0.0001$ ). Statistical significance was determined with a two-way ANOVA **(F)** and a two-tailed unpaired t-test for all other panels.

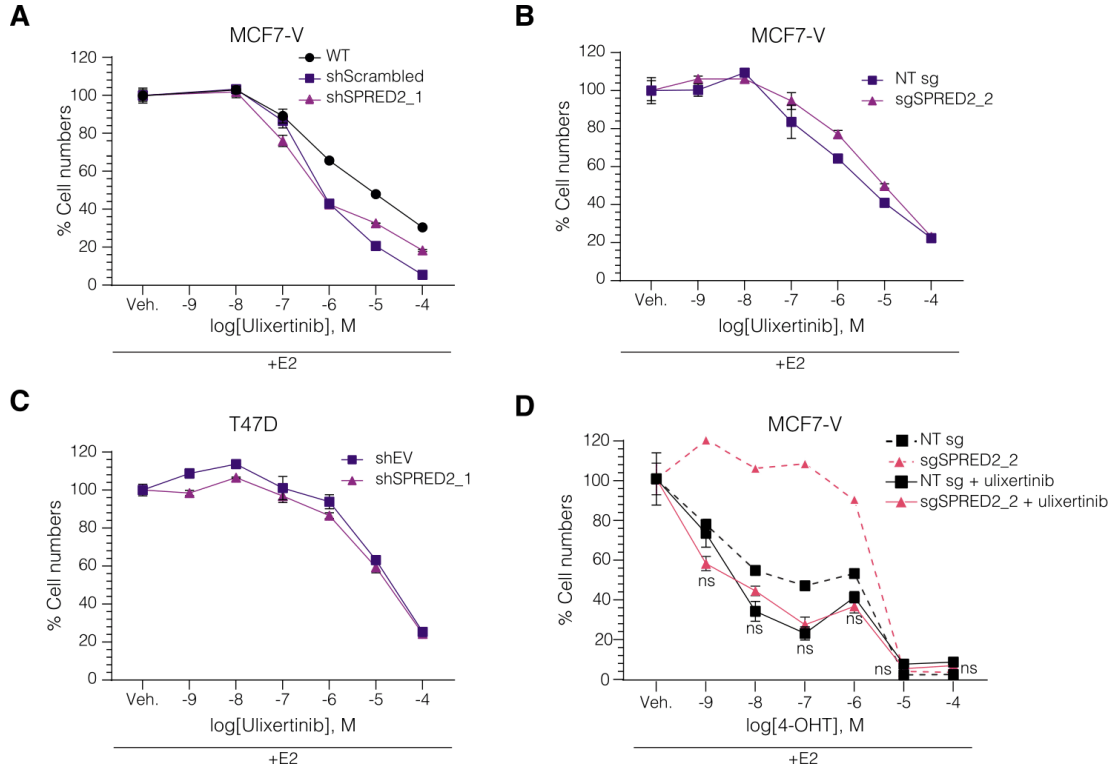

**Figure S4.** Ulixertinib resensitizes SPRED2-deficient BC cells to 4-OHT. **(A-C)** Dose-response curves with increasing doses of ulixertinib in MCF7-V **(A,B)** and T47D **(C)** cells. IC10 to IC20 doses of ulixertinib were chosen for combination treatments, i.e. 100 nM for MCF7-V and 300 nM for T47D cells. WT, parent MCF7-V cells. **(D)** Dose-response curves with increasing doses of 4-OHT in combination with 100 nM ulixertinib for MCF7-V. The dashed curves indicate the response to 4-OHT without ulixertinib, copied from Supplementary Figure S2E for comparison. All error bars represent the standard errors of the means (mean  $\pm$  SEM). Asterisks indicate significant differences compared to the NT sg cells (ns  $p > 0.05$ , \*  $p \leq 0.05$ , \*\*  $p \leq 0.01$ , \*\*\*  $p \leq 0.001$  and \*\*\*\*  $p \leq 0.0001$ ). Statistical significance was determined with a two-way ANOVA.

**Figure S5.** Uncropped images of immunoblots with molecular weight standards.

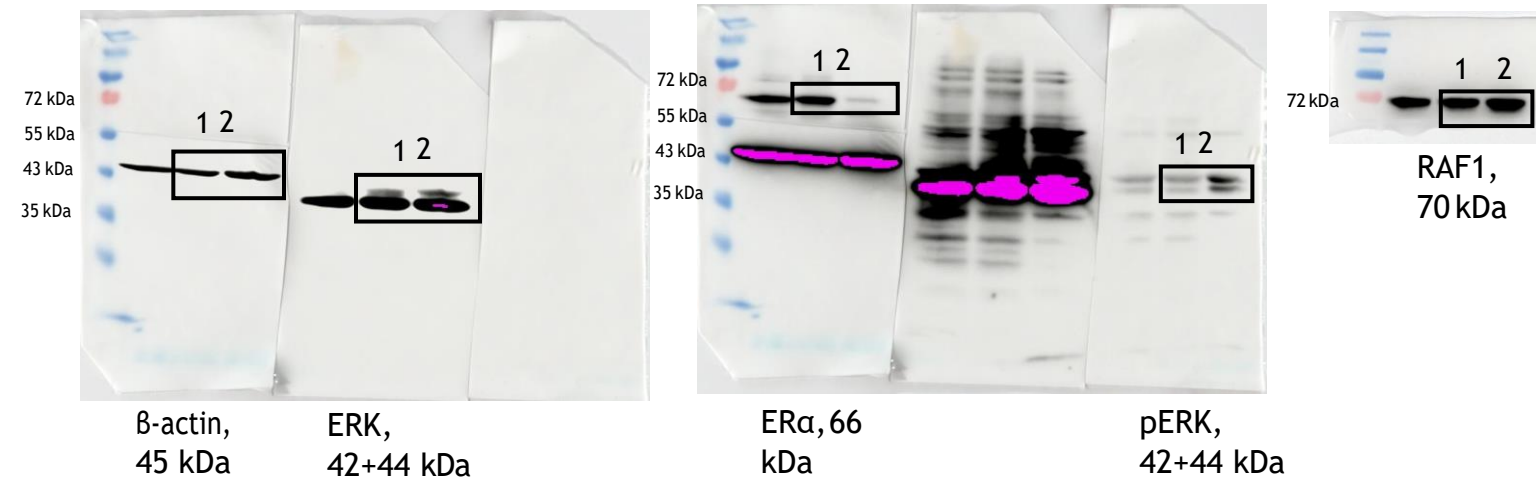

**Figure S3A:**  
**MCF7-V**

1: shScr  
2: shSPRED2

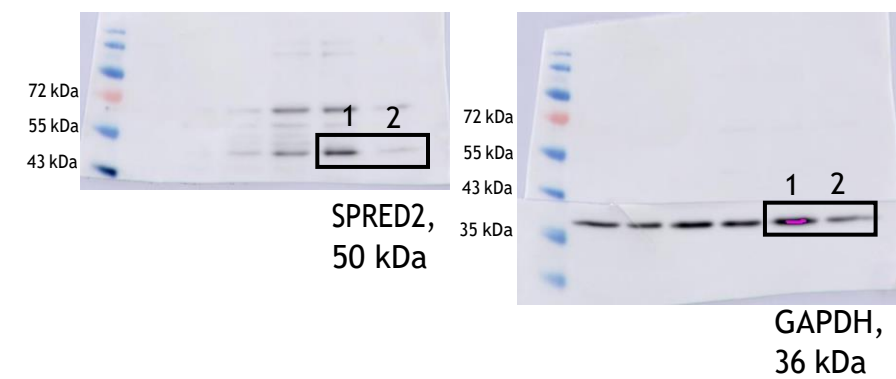

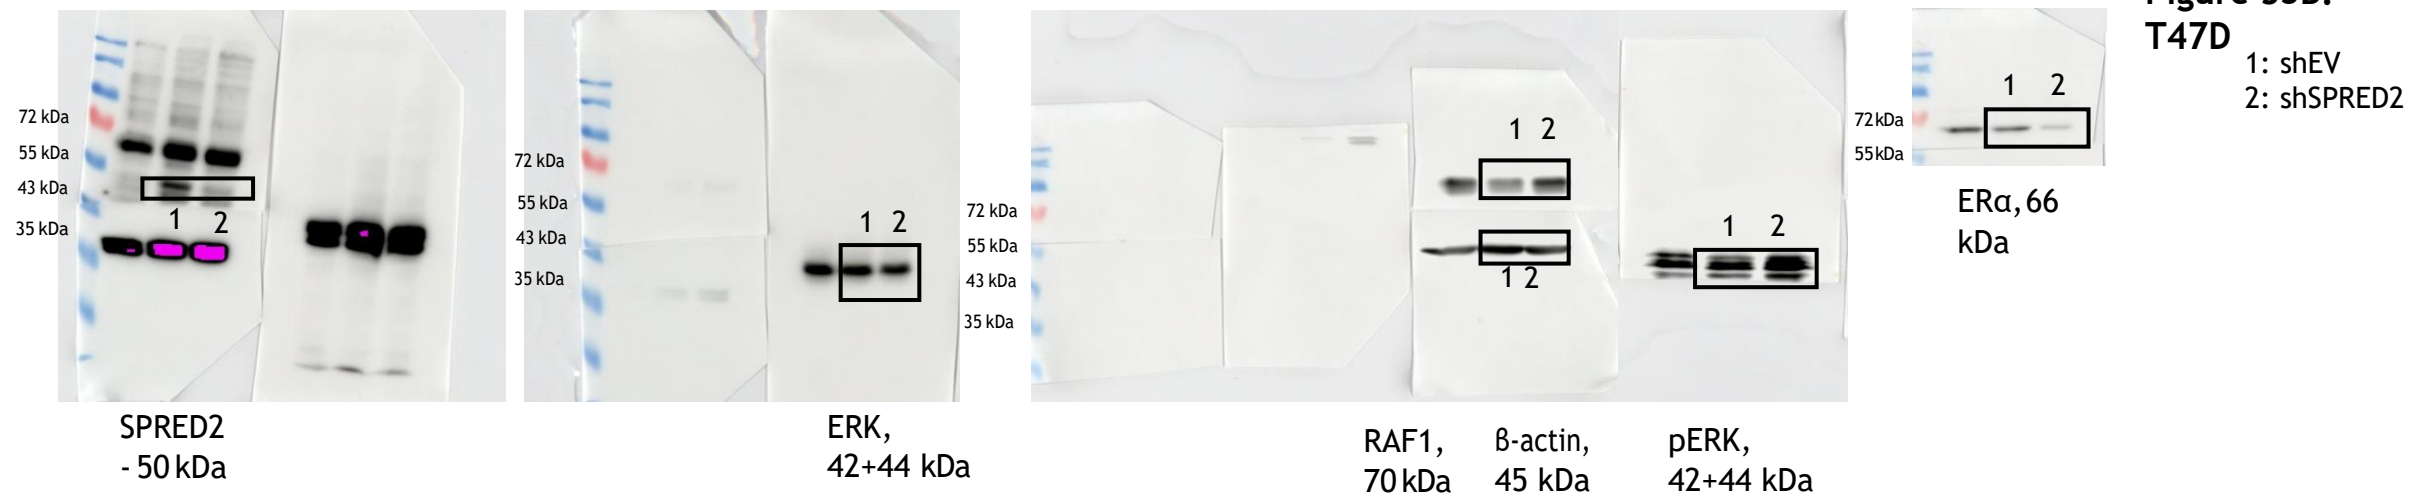

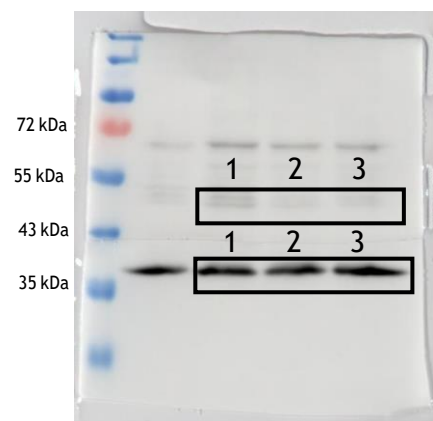

SPRED2  
- 50 kDa

GAPDH,  
36 kDa

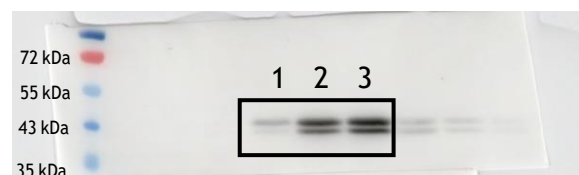

pERK,  
42+44 kDa

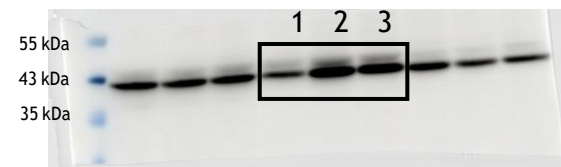

ERK,  
42+44 kDa

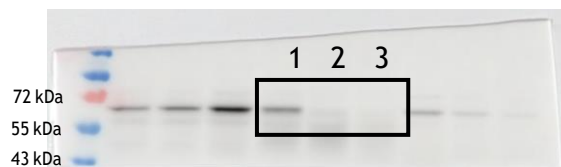

ERα, 66  
kDa

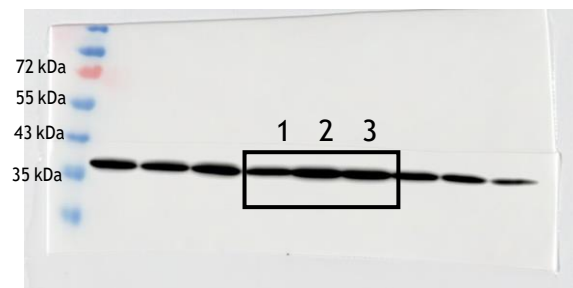

GAPDH,  
36 kDa

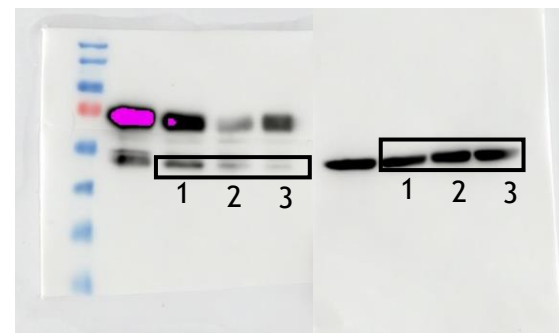

SPRED2  
- 50 kDa

β-actin -  
50 kDa

**Figure S2A:**  
**MCF7-V**

- 1: NT sg
- 2: sgSPRED2 (1)
- 3: sgSPRED2 (2)



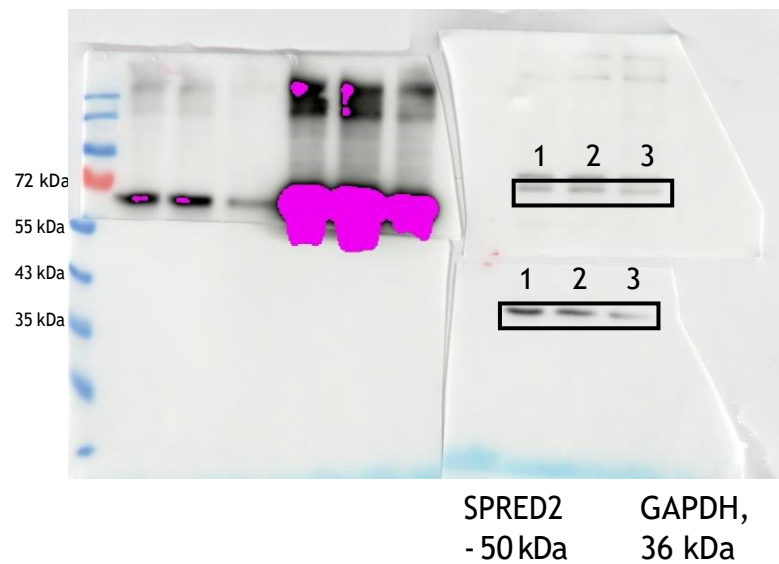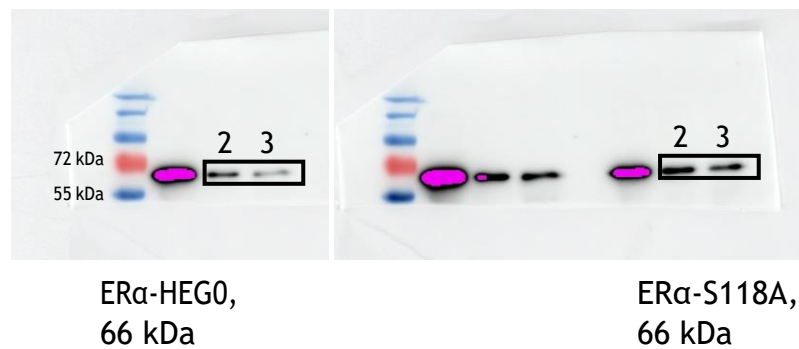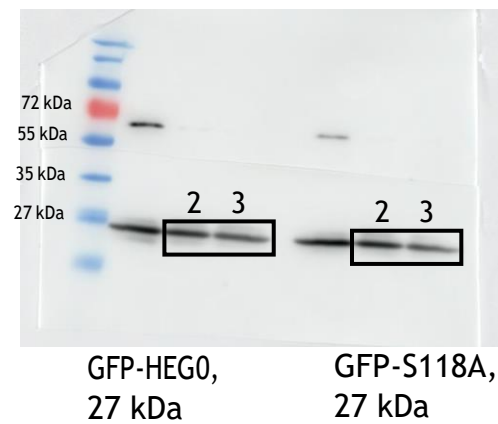

**Figure S3J,K:**  
**HEK293T**

1: HEK WT

2: shScr

3: shSPRED2

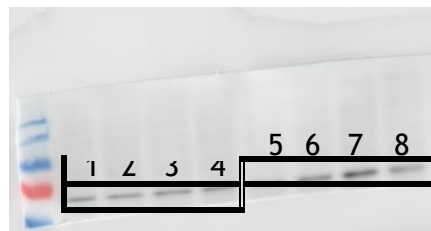

ER $\alpha$ , 66  
kDa

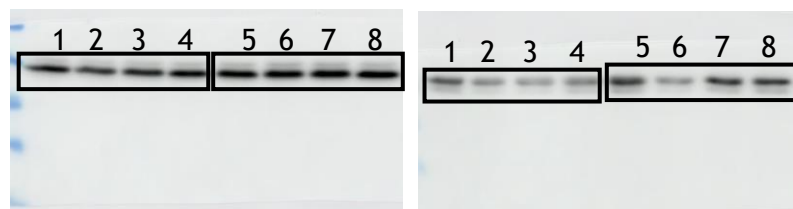

ERK,  
42+44kDa

pERK,  
42+44kDa

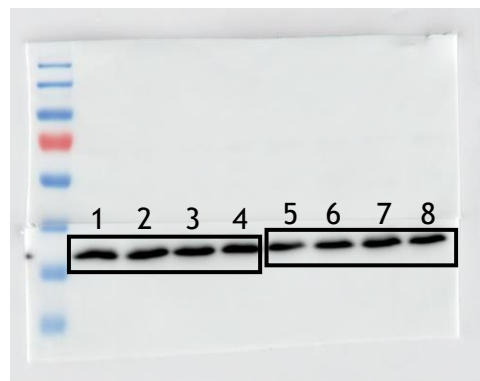

GAPDH,  
36 kDa

### Figure S4C: MCF7-V

- 1: shScr-veh
- 2: shScr- Uli
- 3: shScr- 4-OHT
- 4: shScr- Uli+4-OHT
- 5: shSPRED2-veh
- 6: shSPRED2- Uli
- 7: shSPRED2- 4-OHT
- 8: shSPRED2- Uli+4-OHT
